# Supplementary material
Source: PubMed Central journal article supplement (PMC3157166)
Supplement: mmc1.pdf [file mmc1.pdf]

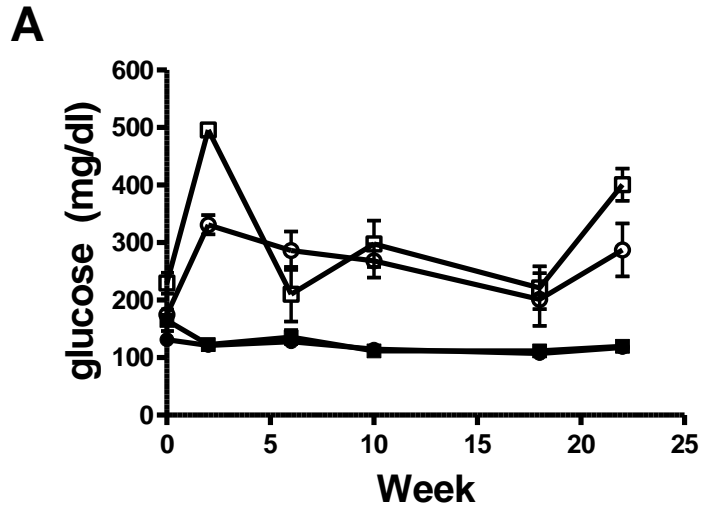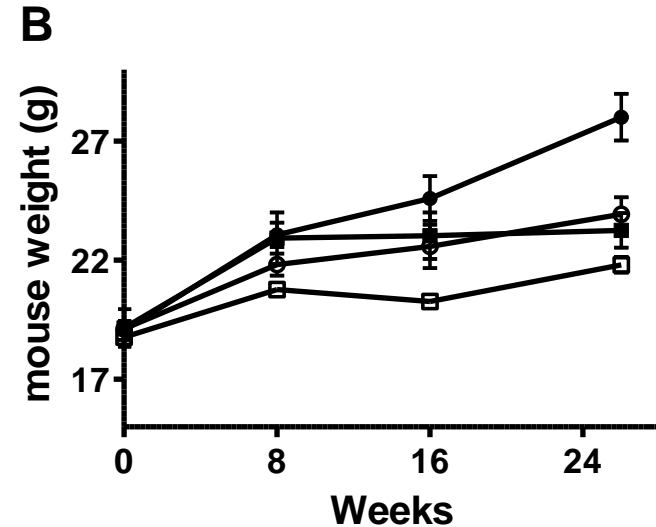

### Supplementary Fig. S1

Supplementary Fig. 1. A. Non fasting tail vein blood glucose was measured using a Freestyle Flash glucometer at the indicated times. B. Mouse weight was measured at the indicated times. Solid symbols represent non-diabetic mice, open symbols represent diabetic mice. Squares represent mice on the 0% cholesterol diet, circles represent mice on the 0.12% cholesterol diet. Data shown is mean  $\pm$  SEM from N=7-14/group.
