# Supplementary material
Source: PubMed Central journal article supplement (PMC3157166)
Supplement: mmc2.pdf [file mmc2.pdf]

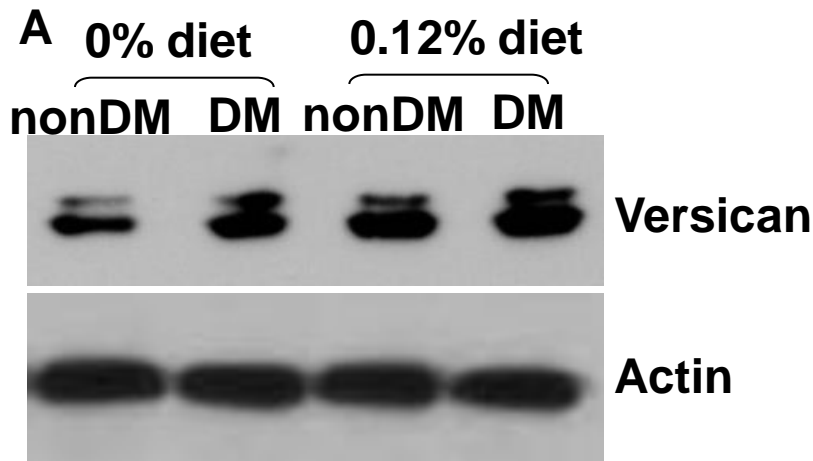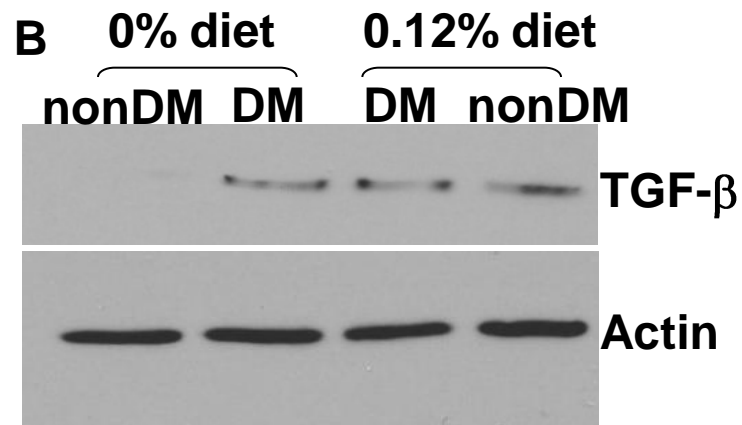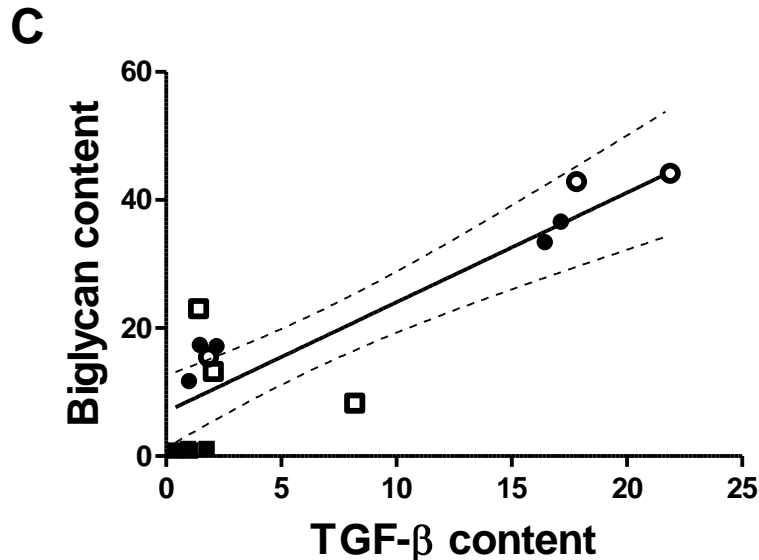

Supplementary Fig. S2. A. Renal versican content. B. Renal TGF- $\beta$  content. Total renal protein was analyzed by western blot for renal versican or TGF-beta content. Each lane shows versican or TGF- $\beta$ , as indicated, from one mouse/group, representative of N=4/group. NonDM indicates non-diabetic group, DM indicates diabetic group. Actin was used as the loading control. C. Renal biglycan and TGF- $\beta$  content determined by densitometry of western blots was analyzed by linear regression. Solid symbols represent non-diabetic mice, open symbols represent diabetic mice. Squares represent mice on the 0% cholesterol diet, circles represent mice on the 0.12% cholesterol diet. Figure depicts N=4/group for all groups. R=0.873, P<0.001, dashed lines represent 95% confidence intervals.
