# Supplementary material
Source: PubMed Central journal article supplement (PMC3157166)
Supplement: mmc3.pdf [file mmc3.pdf]

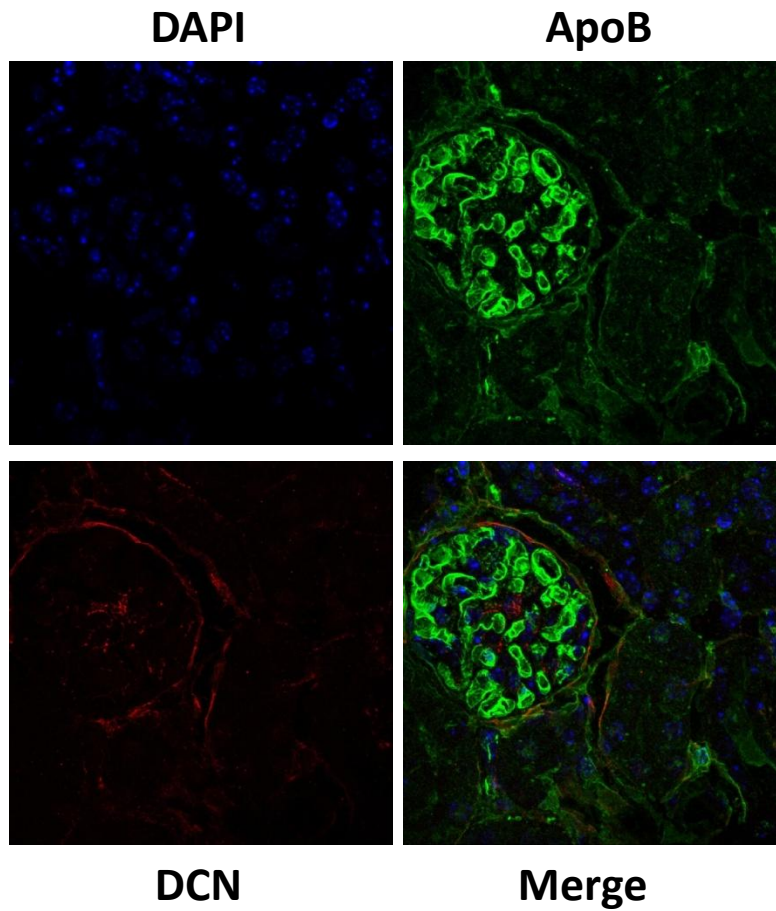

Supplementary figure S3. Shown is a representative section from a diabetic LDLR<sup>-/-</sup> mouse fed the 0.12% cholesterol diet immunostained for decorin (red), apoB (green), nuclear DAPI stain (blue) and the merged image (co-localization yellow).
